# Supplementary figures and images for: A new strategy to tailor the structure of sustainable 3D hierarchical porous N-self-doped carbons from renewable biomass for high-performance supercapacitors and CO2 capture
Source: Royal Society of Chemistry journal article supplement (doi:10.1039/c6ra01565d), 2016-01-01

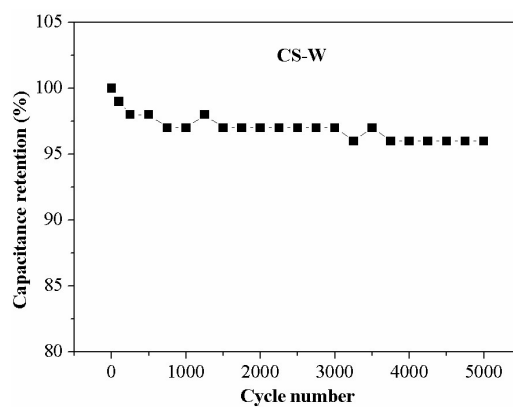

**Figure S1.** Cycling performance of CS-W at 1.0 A/g over 5000 cycles.

Supplement: c6ra01565d1.pdf [file c6ra01565d1.pdf]
